# Supplementary material for: Dynamics of AMPA receptors regulate epileptogenesis in patients with epilepsy
Source: PubMed Central journal article supplement — Cell Rep Med. 2023 Apr 19;4(5):101020. doi: 10.1016/j.xcrm.2023.101020 (PMC10213790; doi:10.1016/j.xcrm.2023.101020), 2023-04-19
Supplement: mmc1.pdf [file mmc1.pdf]

**Supplemental information**

**Dynamics of AMPA receptors regulate  
epileptogenesis in patients with epilepsy**

**Tsuyoshi Eiro, Tomoyuki Miyazaki, Mai Hatano, Waki Nakajima, Tetsu Arisawa, Yuuki Takada, Kimito Kimura, Akane Sano, Kotaro Nakano, Takahiro Mihara, Yutaro Takayama, Naoki Ikegaya, Masaki Iwasaki, Akitoyo Hishimoto, Yoshihiro Noda, Takahiro Miyazaki, Hiroyuki Uchida, Hideaki Tani, Nobuhiro Nagai, Teruki Koizumi, Shinichiro Nakajima, Masaru Mimura, Nozomu Matsuda, Kazuaki Kanai, Kazuhiro Takahashi, Hiroshi Ito, Yoji Hirano, Yuichi Kimura, Riki Matsumoto, Akio Ikeda, and Takuya Takahashi**

| <b>Patient</b> | <b>Gender/age,y</b> | <b>Onset age,y</b> | <b>Duration,y</b> | <b>Seizure type</b> | <b>Estimated epileptogenic focus</b> |
|----------------|---------------------|--------------------|-------------------|---------------------|--------------------------------------|
| 1              | M/33                | 11                 | 22                | FIAS/FAS            | Left temporal lobe                   |
| 2              | M/48                | 25                 | 23                | FIAS/FAS            | Right temporal lobe                  |
| 3              | M/26                | 26                 | 1                 | FIAS                | Left temporal lobe                   |
| 4              | M/38                | 11                 | 27                | FIAS                | Right temporal lobe                  |
| 5              | M/38                | 29                 | 9                 | FIAS/FAS            | Frontal lobe                         |

**Table S1. Patient characteristics of focal onset seizures without generalized seizure, Related to Figure 1 and 2.**

FIAS: Focal impaired awareness seizure, FAS: Focal aware seizure.

| Patient | Gender /age,y | Onset age,y | Duration,y | Seizure type   | Estimated epileptogenic focus |
|---------|---------------|-------------|------------|----------------|-------------------------------|
| 6       | M/25          | 0           | 25         | FIAS/FAS+FBTCS | Right hypothalamus            |
| 7       | M/21          | 13          | 8          | FIAS+FBTCS     | Left temporal lobe            |
| 8       | M/50          | 10          | 40         | FIAS+FBTCS     | Bilateral temporal lobe       |
| 9       | M/25          | 9           | 16         | FAS +FBTCS     | Right frontal lobe            |
| 10      | M/55          | 53          | 2          | FIAS+FBTCS     | Right frontal lobe            |
| 11      | M/35          | 6           | 29         | FAS +FBTCS     | Left occipital lobe           |
| 12      | M/39          | 18          | 20         | FIAS+FBTCS     | Right frontal lobe            |
| 13      | M/45          | 31          | 14         | FIAS+FBTCS     | Unknown                       |
| 14      | M/30          | 28          | 2          | FIAS+FBTCS     | Right temporal lobe           |
| 15      | M/31          | 14          | 17         | FIAS+FBTCS     | Left temporal lobe            |
| 16      | M/21          | 15          | 6          | FAS +FBTCS     | Left frontal lobe             |
| 17      | M/46          | 4           | 42         | FIAS+FBTCS     | Unknown                       |
| 18      | M/30          | 20          | 10         | FIAS+FBTCS     | Right frontal lobe            |
| 19      | M/31          | 11          | 14         | FIAS+FBTCS     | Left frontal lobe             |
| 20      | M/50          | 42          | 8          | FIAS+FBTCS     | Left temporal lobe            |
| 21      | M/26          | 20          | 6          | FIAS+FBTCS     | Left temporal lobe            |
| 22      | M/47          | 10          | 37         | FIAS/FAS+FBTCS | Left temporal lobe            |

**Table S2. Patient characteristics of focal to bilateral tonic clonic seizures, Related Figure 1 and 3**

FIAS: Focal impaired awareness seizure, FAS: Focal aware seizure, FBTCS: Focal to bilateral tonic clonic seizure.

| <b>Patient</b> | <b>Gender /age,y</b> | <b>Onset age,y</b> | <b>Duration,y</b> | <b>Seizure type</b> |
|----------------|----------------------|--------------------|-------------------|---------------------|
| 23             | M/28                 | 12                 | 16                | GOTC                |
| 24             | M/23                 | 14                 | 9                 | GOTC                |
| 25             | M/20                 | 12                 | 8                 | GOTC                |
| 26             | M/29                 | 15                 | 14                | GOTC                |
| 27             | M/49                 | 13                 | 36                | GOTC                |
| 28             | M/37                 | 24                 | 2                 | GOTC                |
| 29             | M/26                 | 24                 | 2                 | GOTC                |
| 30             | M/29                 | 24                 | 5                 | GOTC                |

**Table S3. Patient characteristics of generalized onset seizures, Related to Figure 4**

GOTC: Generalized onset tonic clonic.

Figure S1

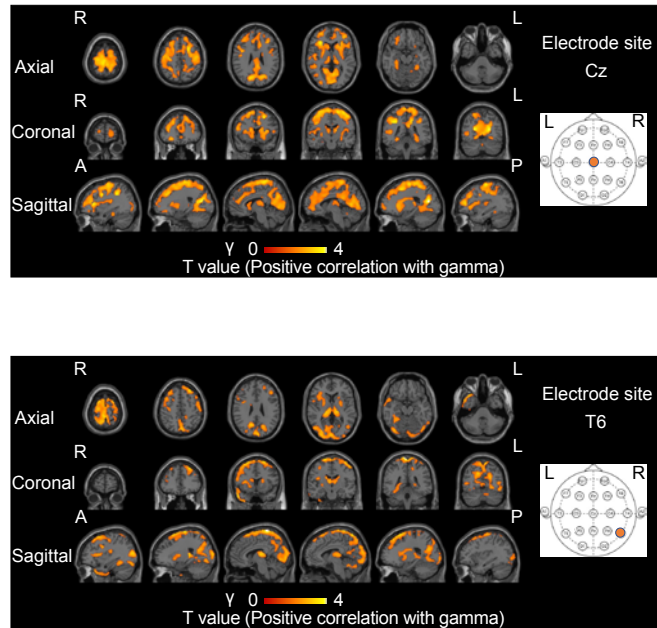

**Figure S1. Positive correlation between the amount of cell surface AMPAR and the amplitude of gamma activity in focal epilepsy detected by multiple electrode sites, Related to Figure 1**

SPM analysis of [<sup>11</sup>C]K-2 in patients with the focal onset seizures identifies the brain regions showing a significant positive correlation between  $SUVR_{30-50 \text{ min}}$  with white matter as a reference and the amplitude of gamma activity in Cz, T6 electrode site ( $p < 0.05$ ,  $T > 1.72$ , one-tailed, FDRc). Scale bar indicates T value of this correlation. R: right side, L: left side, A: anterior side, P: posterior side.

FigureS2

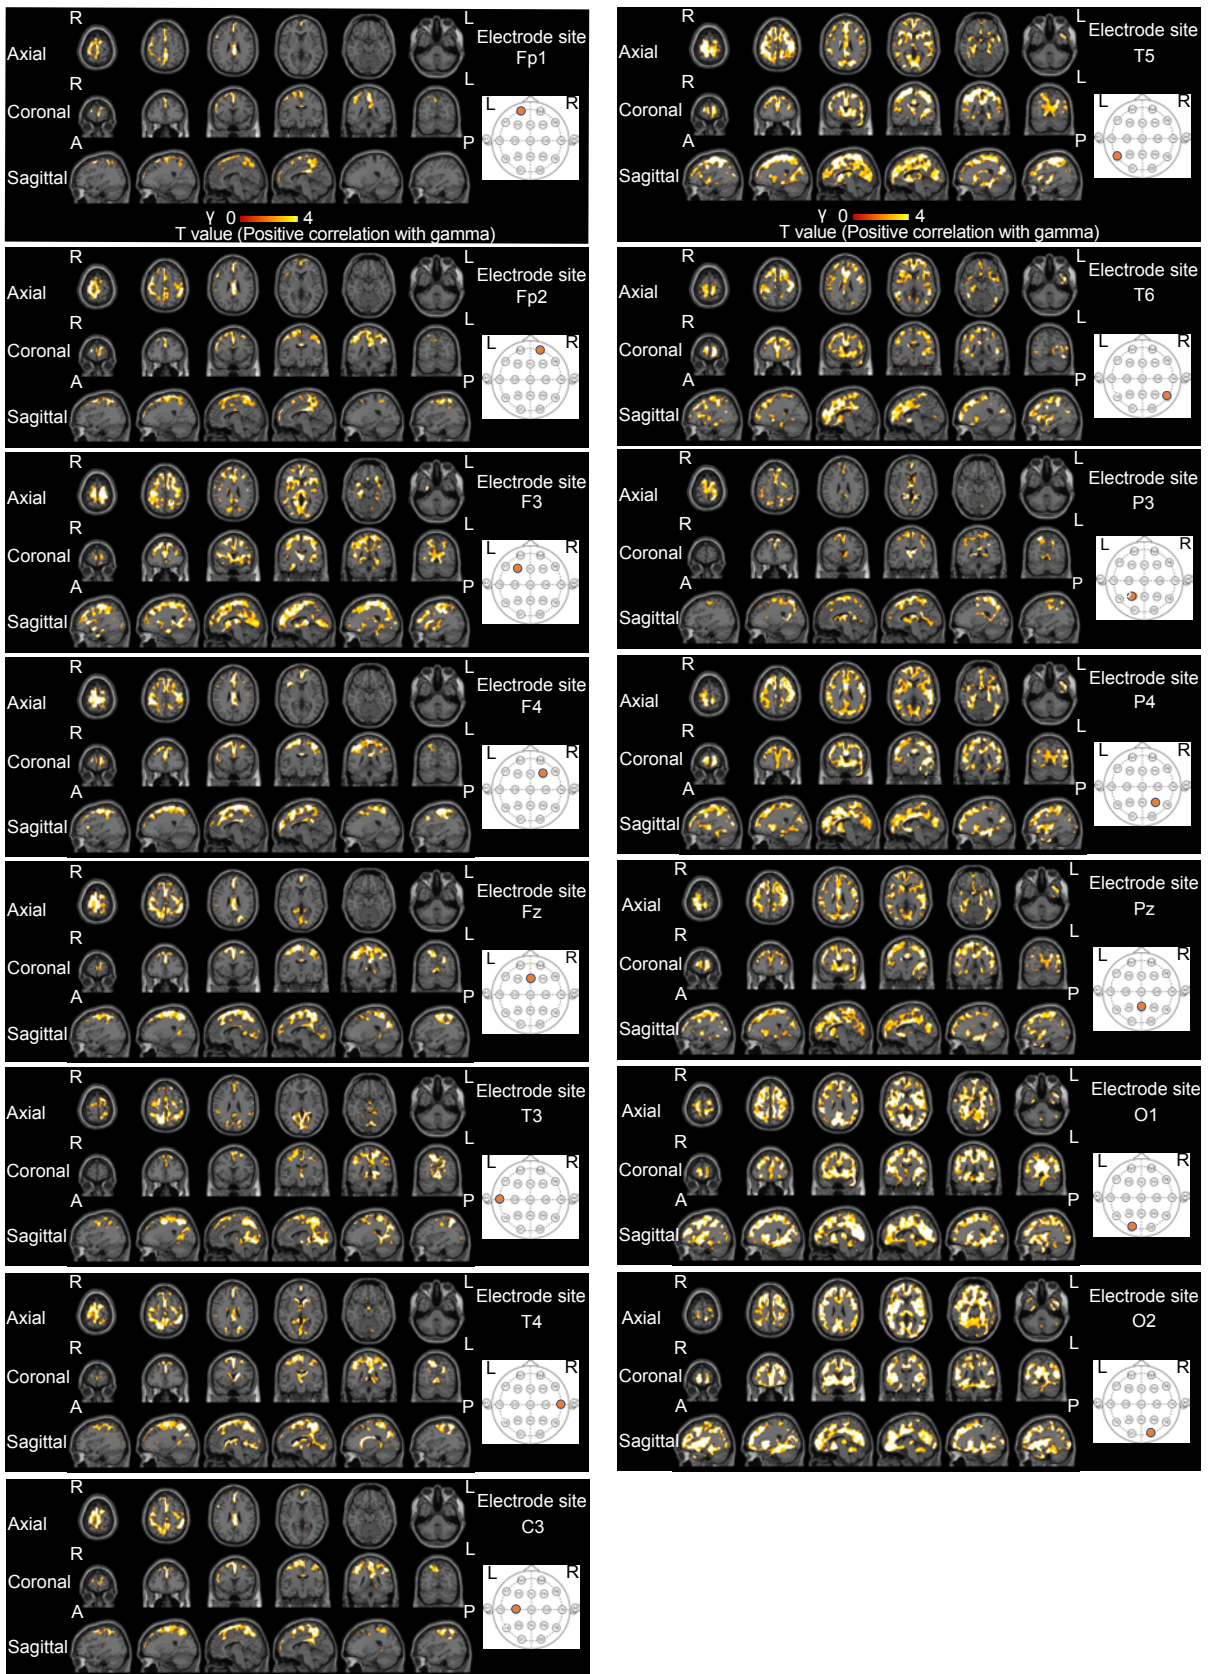

**Figure S2. Positive AMPAR-gamma activity couplings are observed in patients with the focal onset seizures without generalized seizure detected by multiple electrode sites, Related to Figure2**

SPM analysis of [<sup>11</sup>C]K-2 in patients with the focal onset seizures without generalized seizure identifies the brain regions showing a significant positive correlation between  $SUVR_{30-50 \text{ min}}$  with white matter as a reference and the amplitude of gamma activity in Fp1, Fp2, F3, F4, Fz, T3, T4, C3, T5, T6, P3, P4, Pz, O1, O2 electrode site ( $p < 0.05$ ,  $T > 2.35$ , one-tailed, FDRc). Scale bar indicates T value of this correlation.

R: right side, L: left side, A: anterior side, P: posterior side.

Figure S3

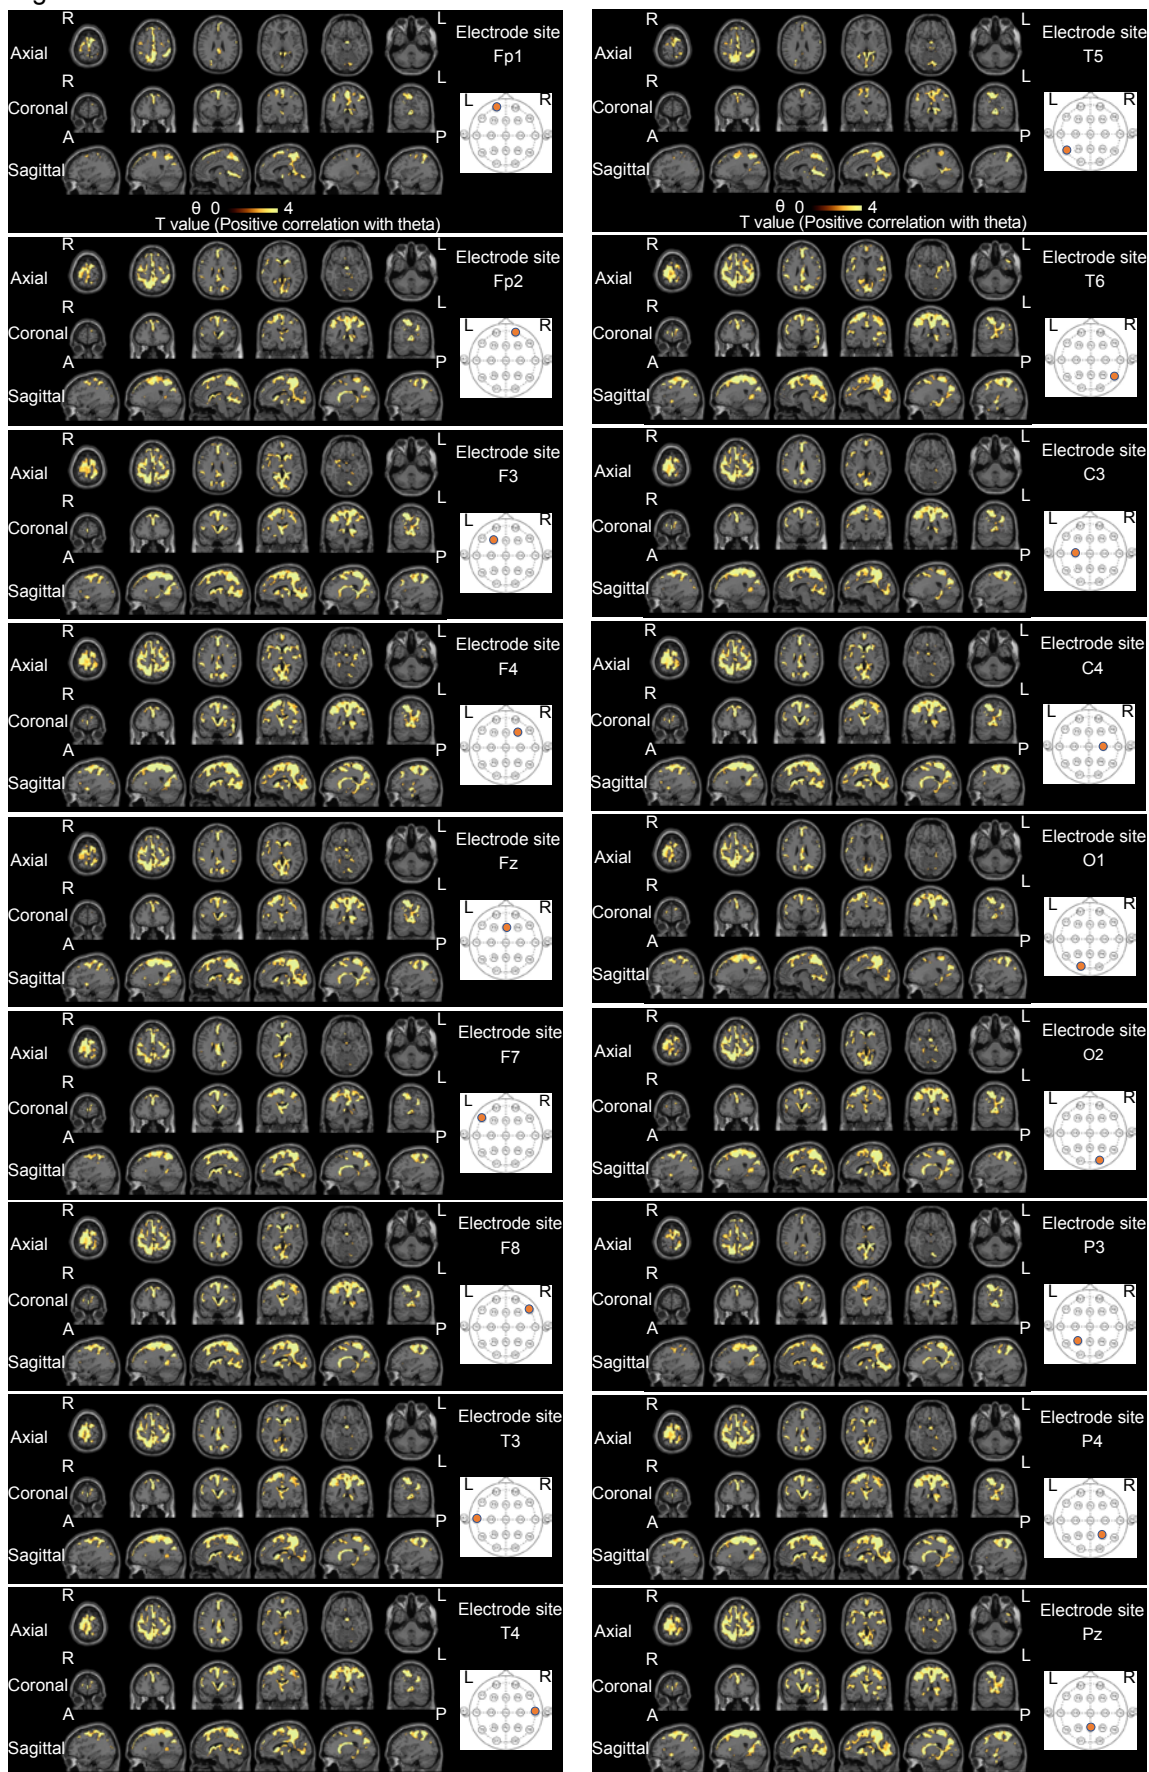



**Figure S3. Positive AMPAR-theta activity couplings are observed in patients with the focal onset seizures without generalized seizure detected by multiple electrode sites, Related to Figure2**

SPM analysis of [<sup>11</sup>C]K-2 in patients with the focal onset seizures without generalized seizure identifies the brain regions showing a significant positive correlation between  $SUVR_{30-50 \text{ min}}$  with white matter as a reference and the amplitude of theta activity in Fp1, Fp2, F3, F4, Fz, F7, F8, C3, C4, T3, T4, T5, T6, P3, P4, Pz, O1, O2 electrode site ( $p < 0.05$ ,  $T > 2.35$ , one-tailed, FDRc). Scale bar indicates T value of this correlation. R: right side, L: left side, A: anterior side, P: posterior side.

Figure S4

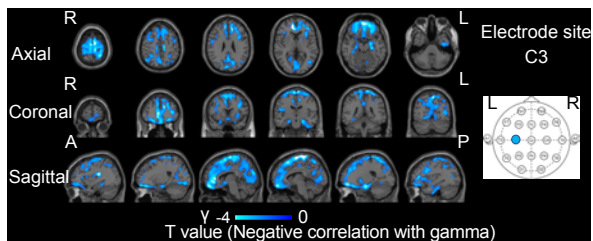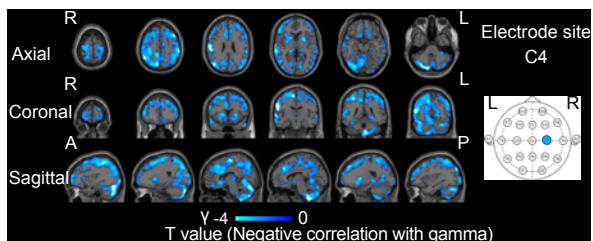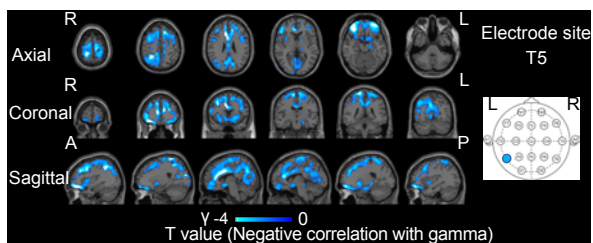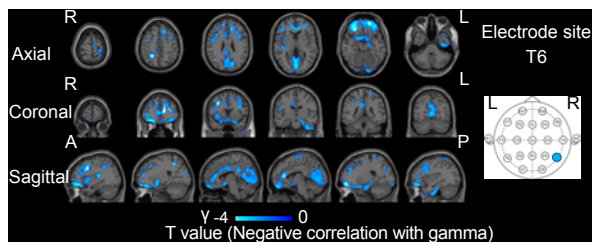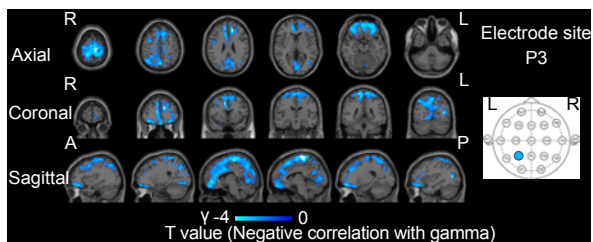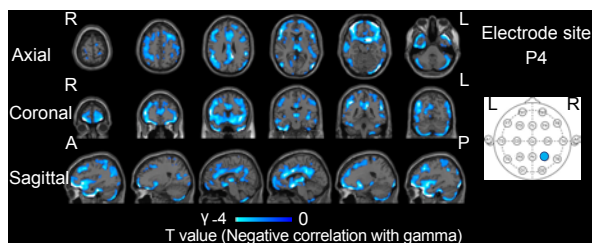

**Figure S4. Generalized onset seizure downregulates AMPAR levels detected by multiple electrode sites, Related to Figure 4**

SPM analysis of [<sup>11</sup>C]K-2 in patients with the generalized onset seizures identifies the brain regions showing a significant negative correlation between SUVR<sub>30-50 min</sub> with white matter as a reference and the amplitude of gamma activity in C3, C4, T5, T6, P3, P4 electrode sites ( $p < 0.05$ ,  $T > 1.94$ , one-tailed, FDRc). Scale bar indicates T value of this correlation. R: right side, L: left side, A: anterior side, P: posterior side.
